# Supplementary material for: In Vitro Effects of Fungal Phytotoxins on Cancer Cell Viability: First Insight into Structure Activity Relationship of a Potent Metabolite of Cochliobolus australiensis Radicinin
Source: MDPI journal article supplement (doi:10.3390/toxins14080517), 2022-07-29
Supplement: s1 [file s1]

# Supplementary materials: *In vitro* effects of fungal phytotoxins on cancer cell viability: first insight into structure activity relationship of the potent metabolite of *Cochliobolus australiensis* radicinin.

**Table S1.** Details on the residual viability observed at each concentration on each cell line.

| Compound                  | Concentration<br>( $\mu$ M) | % of residual viability |       |          | mean |
|---------------------------|-----------------------------|-------------------------|-------|----------|------|
|                           |                             | A549                    | Hs683 | SKMEL-28 |      |
| 1, Radicinin              | 100                         | 1                       | 0     | 5        | 2    |
|                           | 50                          | 1                       | 0     | 7        | 2    |
|                           | 10                          | 22                      | 38    | 27       | 29   |
|                           | 1                           | 72                      | 71    | 83       | 75   |
| 2, Chloromonilinic acid B | 100                         | 72                      | 78    | 76       | 75   |
|                           | 50                          | 87                      | 95    | 93       | 92   |
|                           | 10                          | 99                      | 108   | 105      | 104  |
|                           | 1                           | 109                     | 120   | 116      | 115  |
| 3, Chloromonilinic acid D | 100                         | 85                      | 91    | 67       | 81   |
|                           | 50                          | 112                     | 119   | 88       | 106  |
|                           | 10                          | 112                     | 119   | 88       | 106  |
|                           | 1                           | 136                     | 146   | 107      | 130  |
| 4, Viridiol               | 100                         | 11                      | 9     | 9        | 10   |
|                           | 50                          | 70                      | 59    | 59       | 63   |
|                           | 10                          | 125                     | 106   | 107      | 113  |
|                           | 1                           | 120                     | 102   | 103      | 108  |
| 5, 1-deoxyviridiol        | 100                         | 36                      | 46    | 39       | 41   |
|                           | 50                          | 63                      | 82    | 70       | 72   |
|                           | 10                          | 95                      | 122   | 104      | 107  |
|                           | 1                           | 104                     | 135   | 114      | 118  |
| 6, Hyfraxinic acid        | 100                         | 71                      | 89    | 83       | 81   |
|                           | 50                          | 87                      | 109   | 102      | 99   |
|                           | 10                          | 98                      | 123   | 115      | 112  |
|                           | 1                           | 103                     | 129   | 121      | 118  |
| 7, Massarilactone D       | 100                         | 55                      | 64    | 60       | 59   |
|                           | 50                          | 76                      | 89    | 82       | 82   |
|                           | 10                          | 104                     | 123   | 114      | 114  |
|                           | 1                           | 101                     | 120   | 111      | 111  |
| 8, Massarilactone H       | 100                         | 3                       | 3     | 3        | 3    |
|                           | 50                          | 6                       | 5     | 5        | 5    |
|                           | 10                          | 111                     | 104   | 97       | 104  |
|                           | 1                           | 117                     | 110   | 102      | 110  |

**Table S2.** Details the residual viability observed at each concentration on each cell line. ND: not determined

| Compound                                       | Concentration<br>( $\mu$ M) | % of residual viability |       |          | mean |
|------------------------------------------------|-----------------------------|-------------------------|-------|----------|------|
|                                                |                             | A549                    | Hs683 | SKMEL-28 |      |
| 1, Radicinin                                   | 100                         | 1                       | 0     | 5        | 2    |
|                                                | 50                          | 1                       | 0     | 7        | 2    |
|                                                | 10                          | 22                      | 38    | 27       | 29   |
|                                                | 1                           | 72                      | 71    | 83       | 75   |
| 9, Radicinol                                   | 100                         | 67                      | 53    | 97       | 72   |
|                                                | 50                          | 86                      | 78    | 109      | 91   |
|                                                | 10                          | 87                      | 78    | 103      | 89   |
|                                                | 1                           | ND                      | ND    | ND       | ND   |
| 10, 3- <i>epi</i> -Radicinol                   | 100                         | 67                      | 61    | 98       | 75   |
|                                                | 50                          | 89                      | 79    | 105      | 91   |
|                                                | 10                          | 95                      | 91    | 105      | 97   |
|                                                | 1                           | 85                      | 86    | 100      | 90   |
| 11, 3- <i>O</i> -Acetylradicinin               | 100                         | 3                       | 2     | 5        | 3    |
|                                                | 50                          | 3                       | 4     | 6        | 4    |
|                                                | 10                          | 33                      | 63    | 47       | 48   |
|                                                | 1                           | 83                      | 101   | 97       | 93   |
| 12- <i>O</i> -Mesylradicinin                   | 100                         | 3                       | 1     | 3        | 2    |
|                                                | 50                          | 3                       | 1     | 6        | 3    |
|                                                | 10                          | 40                      | 76    | 24       | 47   |
|                                                | 1                           | 97                      | 99    | 98       | 98   |
| 13, 3- <i>O</i> -(5-azidopentanoyl radicinin)  | 100                         | 0                       | 0     | 8        | 3    |
|                                                | 50                          | 3                       | 2     | 10       | 5    |
|                                                | 10                          | 66                      | 76    | 97       | 80   |
|                                                | 1                           | ND                      | ND    | ND       | ND   |
| 14, 3,4- <i>O,O'</i> diacetyl radicinol        | 100                         | 58                      | 56    | 79       | 64   |
|                                                | 50                          | 80                      | 77    | 90       | 82   |
|                                                | 10                          | 91                      | 93    | 104      | 96   |
|                                                | 1                           | ND                      | ND    | ND       | ND   |
| 15, 3-Deoxyradicinin                           | 100                         | 0                       | 1     | 4        | 2    |
|                                                | 50                          | 0                       | 1     | 5        | 2    |
|                                                | 10                          | 52                      | 72    | 67       | 64   |
|                                                | 1                           | 93                      | 91    | 110      | 98   |
| 16, 2,3-Dehydroradicinin                       | 100                         | 2                       | 6     | 3        | 4    |
|                                                | 50                          | 9                       | 11    | 4        | 8    |
|                                                | 10                          | 85                      | 90    | 91       | 89   |
|                                                | 1                           | 93                      | 97    | 102      | 97   |
| 17, 4-methoxy-6-methyl-2 <i>H</i> -pyran-2-one | 100                         | 61                      | 74    | 111      | 82   |

|                                                                  |     |     |     |     |     |
|------------------------------------------------------------------|-----|-----|-----|-----|-----|
|                                                                  | 50  | 83  | 103 | 119 | 102 |
|                                                                  | 10  | 91  | 133 | 129 | 117 |
|                                                                  | 1   | 90  | 106 | 132 | 109 |
| <b>18</b> , 3-Bromo-4-methoxy-6-methyl-2H-pyran-2-one            | 100 | 7   | 17  | 15  | 13  |
|                                                                  | 50  | 61  | 52  | 80  | 64  |
|                                                                  | 10  | 108 | 85  | 113 | 102 |
|                                                                  | 1   | 113 | 92  | 112 | 106 |
| <b>19</b> , (E)-4-methoxy-6-(propen-1-yl)-2H-pyran-2-one         | 100 | 66  | 61  | 93  | 73  |
|                                                                  | 50  | 96  | 83  | 105 | 95  |
|                                                                  | 10  | 102 | 93  | 108 | 101 |
|                                                                  | 1   | 101 | 91  | 107 | 99  |
| <b>20</b> , (E)-3-bromo-4-methoxy-6-(propen-1-yl)-2H-pyran-2-one | 100 | 48  | 49  | 61  | 53  |
|                                                                  | 50  | 86  | 89  | 89  | 88  |
|                                                                  | 10  | 110 | 111 | 106 | 109 |
|                                                                  | 1   | 113 | 103 | 99  | 105 |
